# Supplementary material for: The Idiosyncrasy of Involuntary Musical Imagery Repetition (IMIR) Experiences
Source: Oxford University Press journal article supplement (doi:10.1525/mp.2022.39.3.320), 2022-02-01
Supplement: mp3903_06_liptak_supplement.docx [file mp3903_06_liptak_supplement.docx]

Table 1

Spearman C*orrelations of Musical Training, Active Engagement with Music, Music Content, and IMIR Content*

|  | Vocal IMIR | Instrumental IMIR | Fast Tempo IMIR | Slow Tempo IMIR |
| --- | --- | --- | --- | --- |
| GMSI-Musical Training | -.28** | .31** | .00 | .08 |
| GMSI-Active Engagement | -.19** | .34** | -.10 | .10 |
| Vocal Music | .49** | -.43** | .18** | -.07 |
| Instrumental Music | -.42** | .55** | -.16** | .16** |
| Fast Tempo Music | .19** | -.16** | .48** | -.24** |
| Slow Tempo Music | -.06 | .06 | -.15* | .25** |
| Vocal IMIR |  | -.61** | .23** | -.11 |
| Instrumental IMIR |  |  | -.16** | .14* |
| Fast Tempo IMIR |  |  |  | -.54** |

*GMSI* Goldsmiths Musical Sophistication Index

* *p* < .05. ** *p* < .01

Table 2

Spearman C*orrelations of IMIR Content, Music Content, and Musical Training and Active Engagement with Music with IMIR Characteristics (Frequency, Episode Duration, and Section Duration)*

|  | IMIR Frequency | IMIR Duration (Episode) | IMIR Duration (Section ) |
| --- | --- | --- | --- |
| **IMIR Content** |  |  |  |
| Vocal | -.03 | -.04 | .12 |
| Instrumental | .10 | .01 | -.09 |
| Fast Tempo | -.02 | -.03 | -.03 |
| Slow Tempo | .03 | .01 | .12 |
| **Music Content** |  |  |  |
| Vocal | -.05 | .02 | .03 |
| Instrumental | .14 | .02 | -.04 |
| Fast Tempo | -.08 | .01 | .04 |
| Slow Tempo | .01 | .05 | .04 |
| **GMSI** |  |  |  |
| Musical Training | .21** | .17** | -.10 |
| Active engagement | .31** | .09 | -.07 |

*GMSI* Goldsmiths Musical Sophistication Index

** *p* < .01
